# Supplementary material for: Distinct Alteration of Gene Expression Programs in the Small Intestine of Male and Female Mice in Response to Ablation of Intestinal Fabp Genes
Source: MDPI journal article supplement (doi:10.3390/genes11080943), 2020-08-15
Supplement: s1 [file s1]

Male

Female

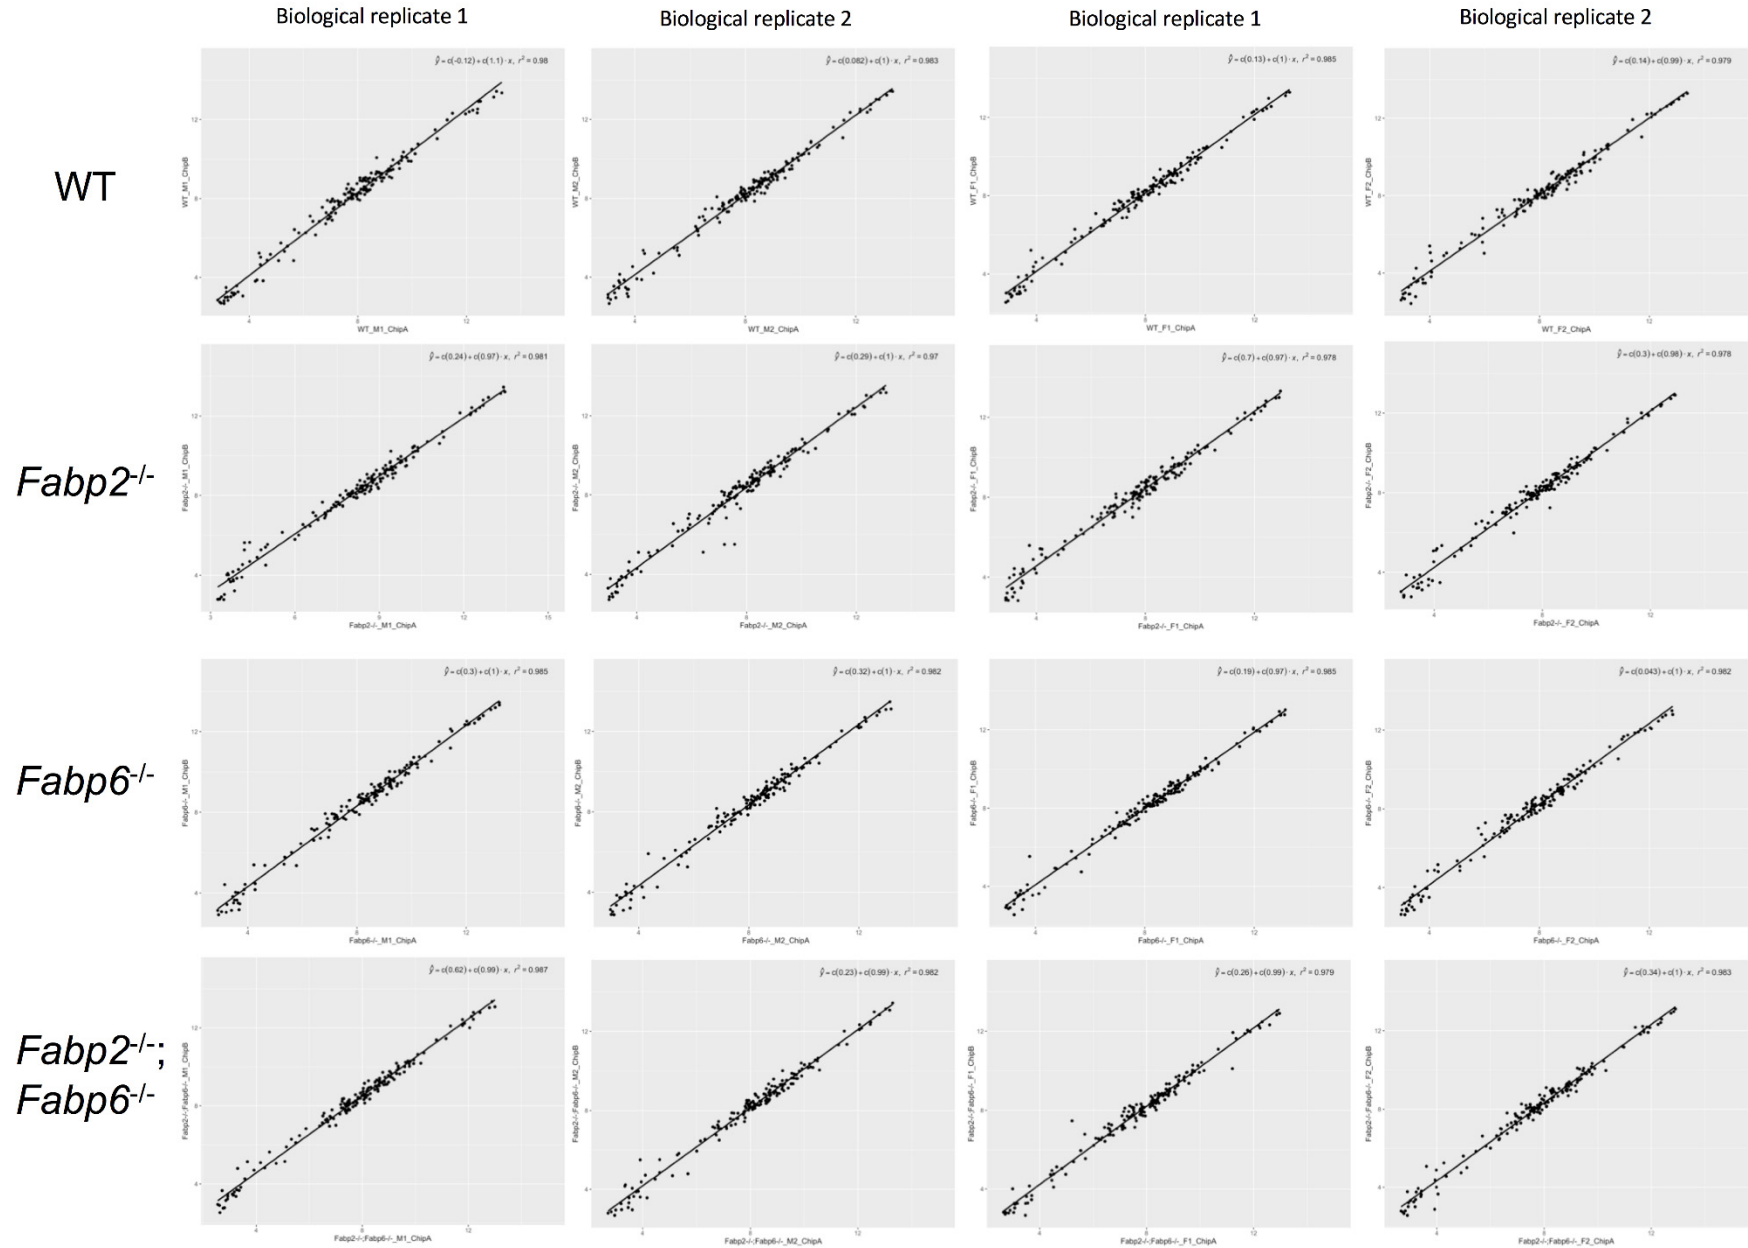

Supplementary Figure S3: Assessment of the quality of data by comparing signal intensities of shared probes on Chip 430A (x-axis) and Chip 430B (y-axis) for each biological replicate using linear correlation after Robust Multichip Average (RMA) processing.
