# Supplementary material for: Distinct Alteration of Gene Expression Programs in the Small Intestine of Male and Female Mice in Response to Ablation of Intestinal Fabp Genes
Source: MDPI journal article supplement (doi:10.3390/genes11080943), 2020-08-15
Supplement: s1 [file s1]

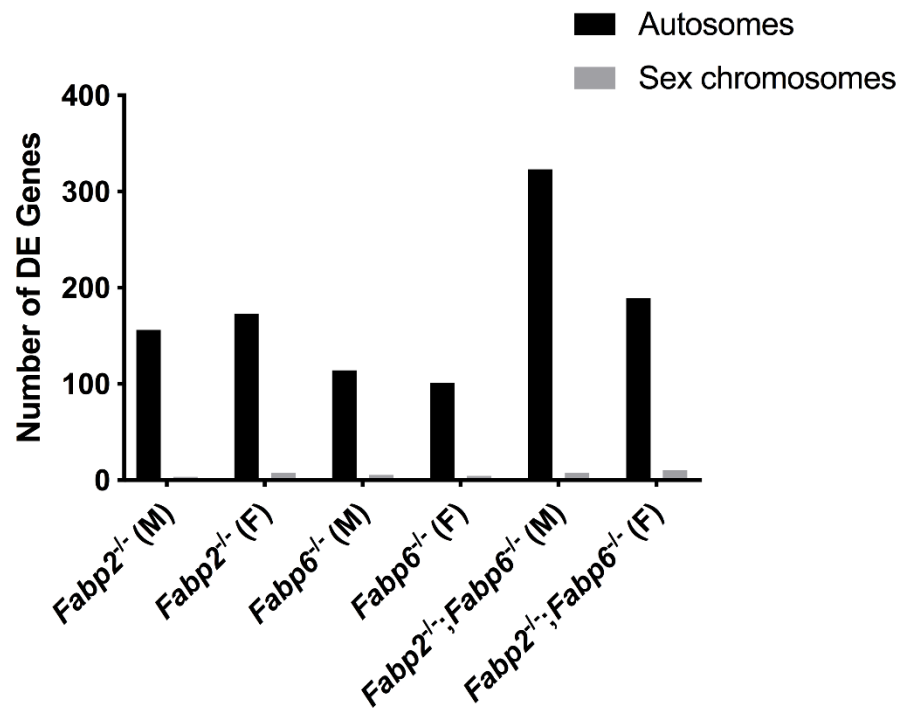

Supplementary Figure S8: Chromosomal location of differentially-expressed (DE) genes identified in male and female intestinal transcriptomes of different *Fabp* gene-disrupted mice.
