# Supplementary material for: Distinct Alteration of Gene Expression Programs in the Small Intestine of Male and Female Mice in Response to Ablation of Intestinal Fabp Genes
Source: MDPI journal article supplement (doi:10.3390/genes11080943), 2020-08-15
Supplement: s1 [file s1]

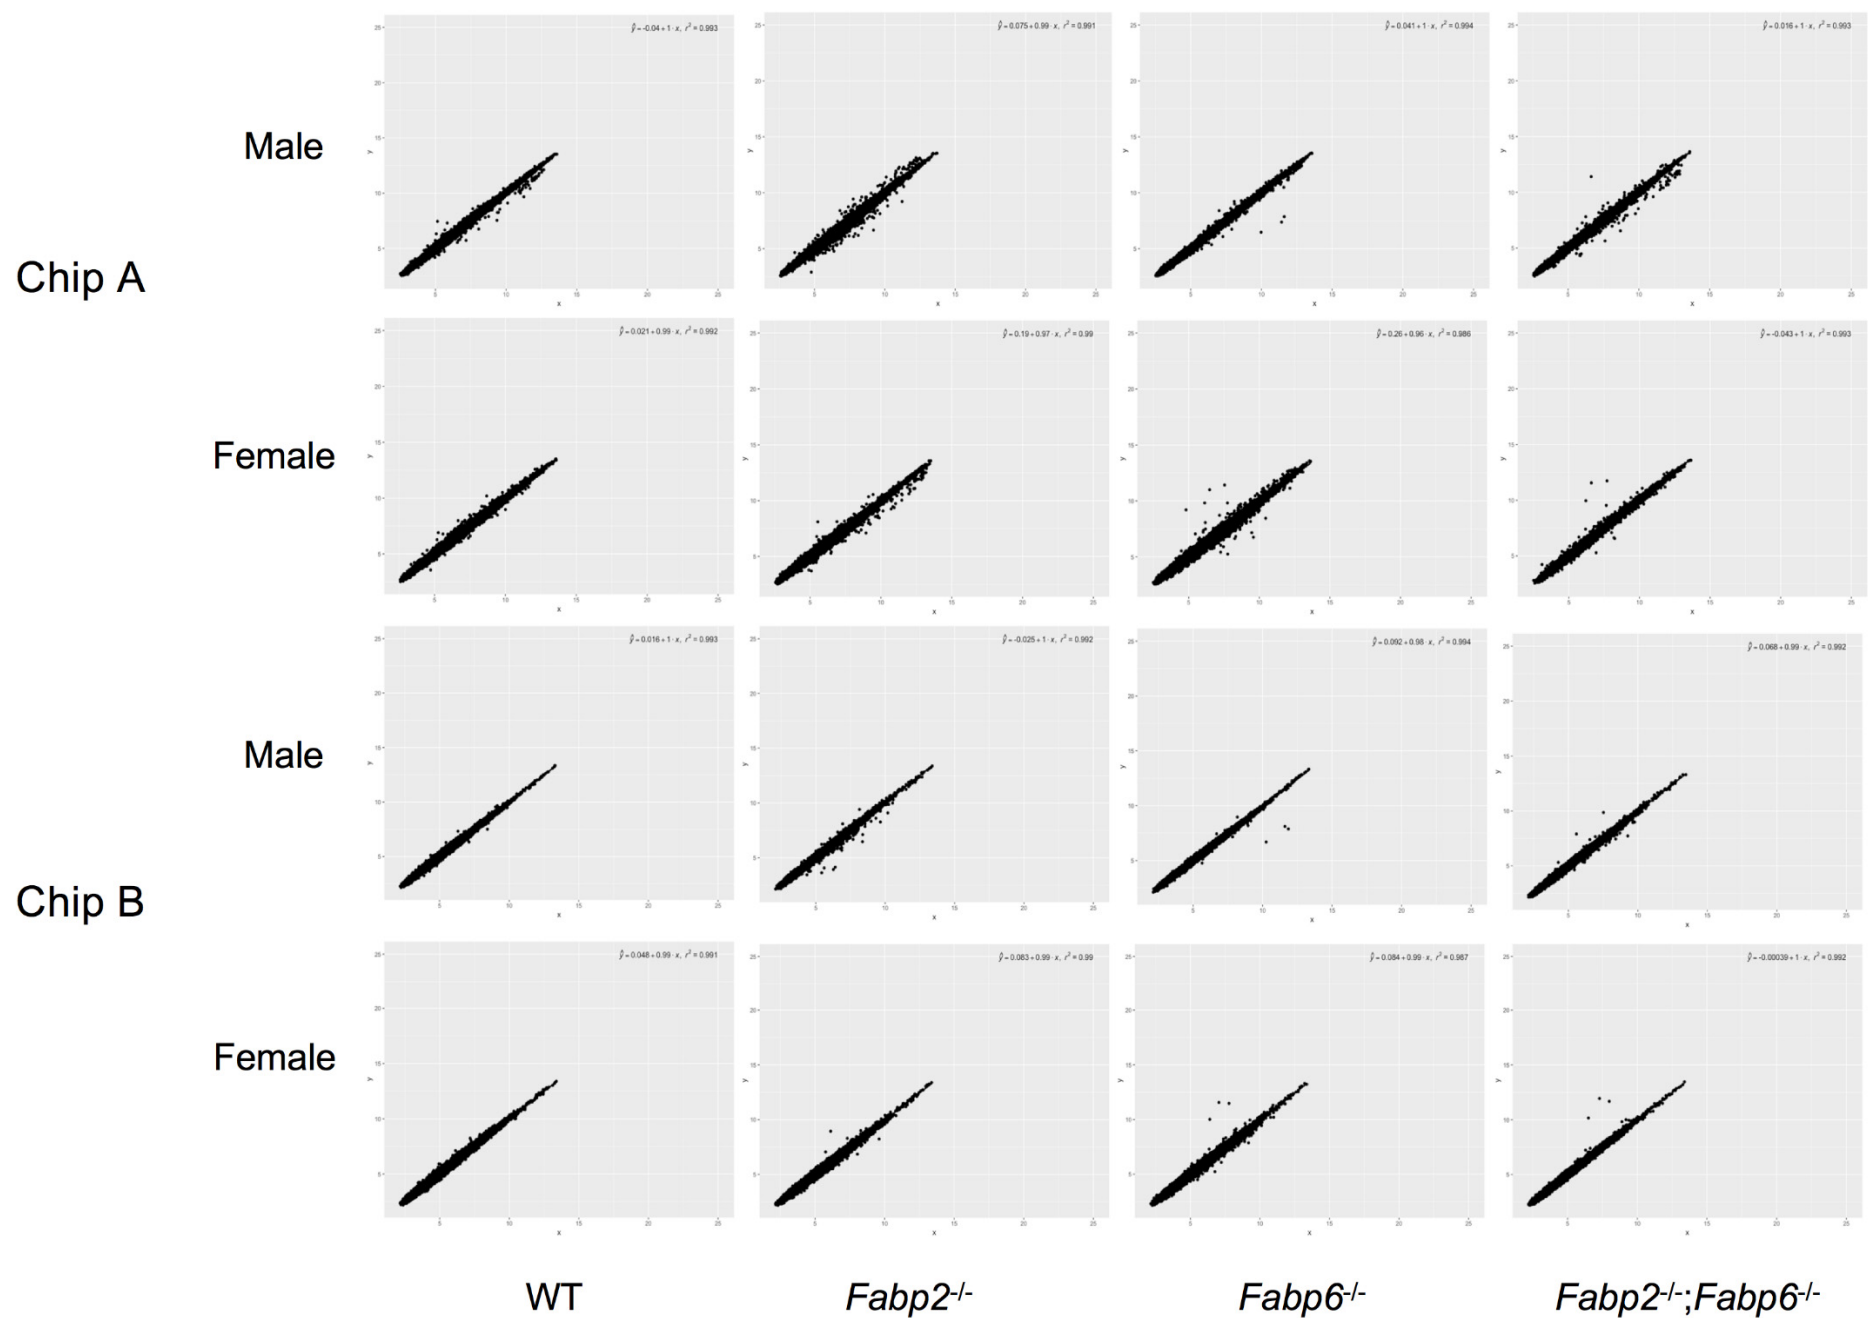

Supplementary Figure S2: Assessment of the quality of data by comparing signal intensity from the biological replicates using linear correlation (x-axis, replicate 1 and y-axis, replicate 2) after Robust Multichip Average (RMA) processing.
