# Supplementary material for: Distinct Alteration of Gene Expression Programs in the Small Intestine of Male and Female Mice in Response to Ablation of Intestinal Fabp Genes
Source: MDPI journal article supplement (doi:10.3390/genes11080943), 2020-08-15
Supplement: s1 [file s1]

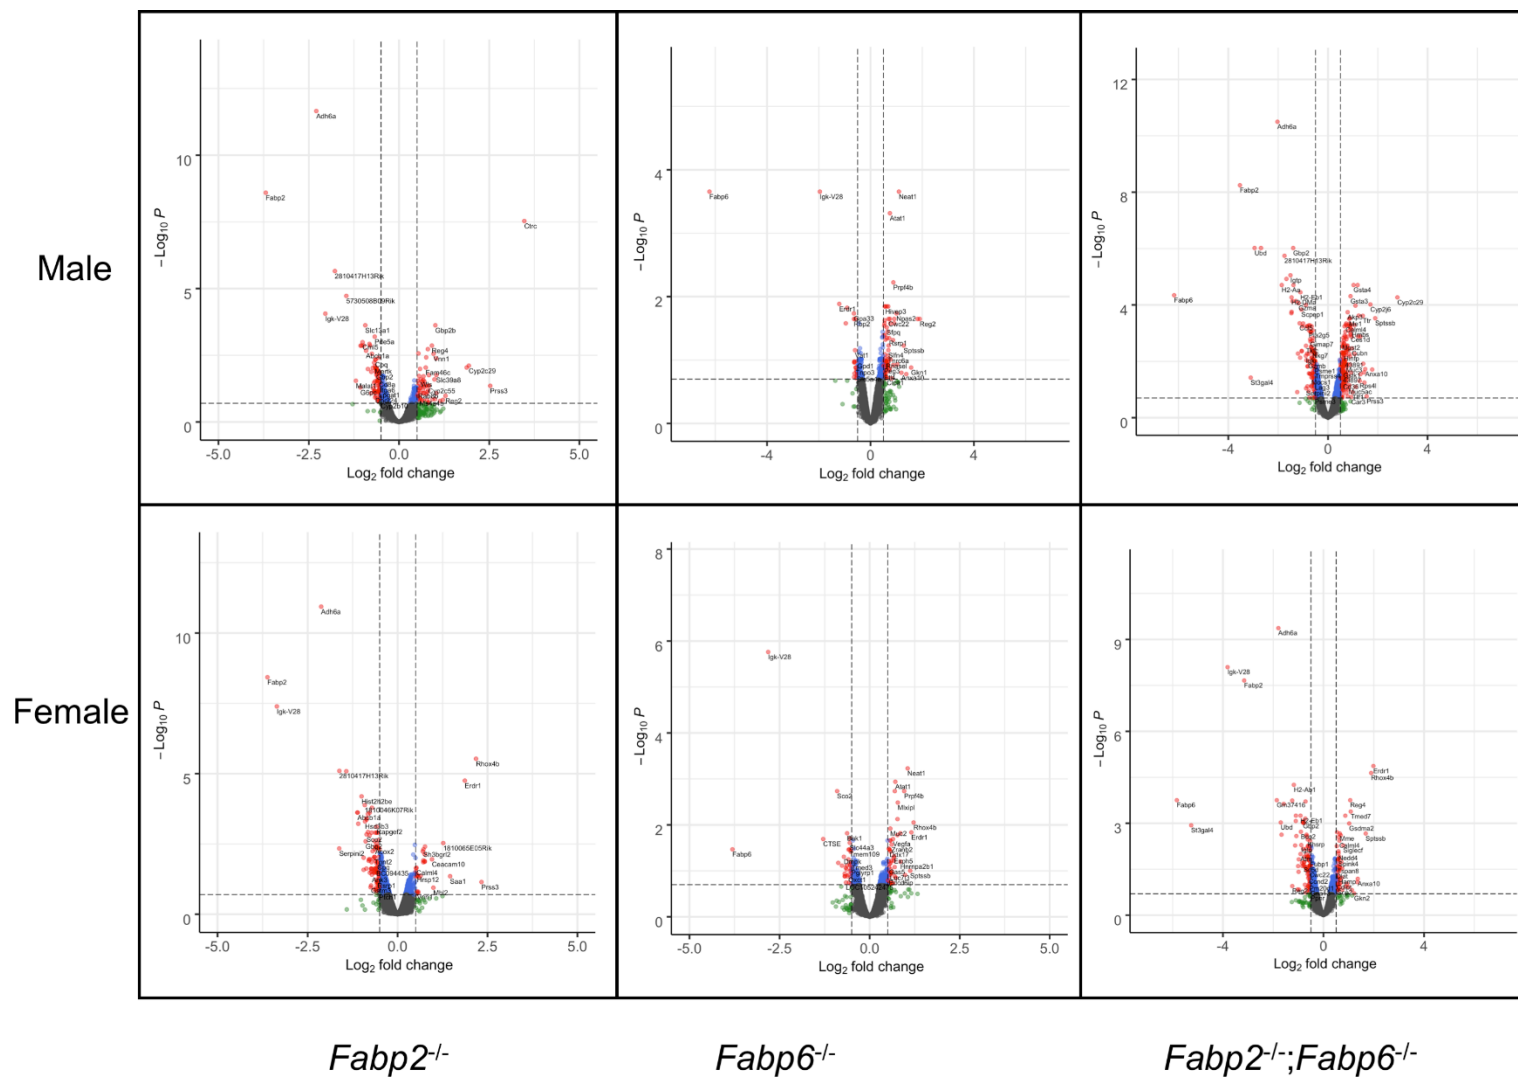

**Supplementary Figure S5. The volcano plots of differentially-expressed genes in different *Fabp* gene-disrupted male and female mice.** Filter 1: False Discovery Rate (FDR) < 0.2; Filter 2: absolute log<sub>2</sub> fold-change > 0.5.
