# Supplementary material for: Distinct Alteration of Gene Expression Programs in the Small Intestine of Male and Female Mice in Response to Ablation of Intestinal Fabp Genes
Source: MDPI journal article supplement (doi:10.3390/genes11080943), 2020-08-15
Supplement: s1 [file s1]

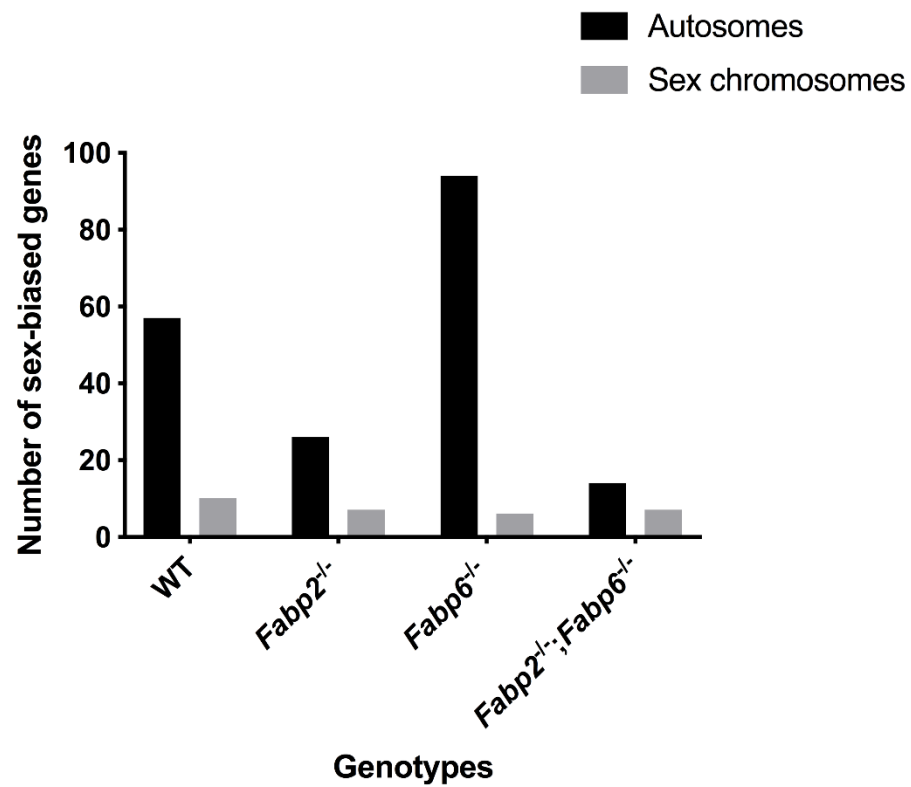

**Supplementary Figure S6: Chromosomal location of sex-biased genes identified in wild-type (WT) and *Fabp* gene-disrupted mice.**
